# Supplementary material for: Urolithins Modulate the Viability, Autophagy, Apoptosis, and Nephrin Turnover in Podocytes Exposed to High Glucose
Source: MDPI journal article supplement (doi:10.3390/cells11162471), 2022-08-09
Supplement: s1 [file s1]

### Material S1. HPLC system and conditions of separations

The Shimadzu HPLC system (Kyoto, Japan) consisting of: two pumps LC-20AD, a degasser DGU-20A5, a semi-micro mixer, an autosampler SIL20AC<sub>XR</sub>, a column oven CTO-20AC, a diode array detector SPD-M20A, a controller CBM-20A, a valve unit FCV-20AH<sub>2</sub>, a nitrogen generator PEAK Scientific GeniusXE35 230. Conditions of separation: Kinetex<sup>®</sup> 2.6  $\mu$ m C18 100 Å column (100 mm x 2.1 mm) (Phenomenex, .Baltimore, USA), column temp. 25°C. The gradient elution program is presented in table 1, the following solvents were used: solvent A water :formic acid (100:0.1 v/v) and solvent B water: acetonitrile: formic acid (50:50: 0.1, v/v/v). Flow rate of mobile phase 0.3 mL/min., UV detection – 305 and 350 nm.

Supplementary Table S1 Gradient elution program

| Time (min) | %B in A+B |
|------------|-----------|
| 0          | 10        |
| 7          | 36        |
| 17         | 56        |
| 22         | 100       |
| 30         | 100       |
| 31         | 10        |
| 45.01      | 10        |

### Material S2. Validation of the developed HPLC-MS/MS method for the determination of urolithin A and its metabolite.

The method was validated by determining the linearity, limit of quantitation (LOQ), limit of detection (LOD), intra- and inter- day repeatability and extraction recovery of urolithin A. Calibration curves were measured for urolithin A as a constituent of two matrix types: NG medium (normal glucose level) and HG medium (high glucose level) by diluting urolithin A at concentrations from 1  $\mu$ M to 12  $\mu$ M in cell culture medium (injection volume was 1  $\mu$ L). The experiment was carried out in triplicate. The limit of detection (LOD) and quantification (LOQ) were estimated by S/N ratio 3 and 10, respectively. The linearity for the working concentrations of urolithin A was assessed by determining the correlation coefficient (Supplementary table 2).

Supplementary Table S2. The values of validation parameters for urolithin A (regression equations, R<sup>2</sup>, LOQ and LOD)

determination in cell culture media with normal (NG) and high (HG) glucose level.

| Type of analyzed matrix | Range of UA concentration ( $\mu$ M) | Regression equation | R <sup>2</sup> | LOD  | LOQ   |
|-------------------------|--------------------------------------|---------------------|----------------|------|-------|
| HG cell culture medium  | 1-12                                 | y=7711.2x-1360.7    | 0.993          | 0.2  | 0.67  |
| NG cell culture medium  | 1-12                                 | y=7316.7x-2995.4    | 0.992          | 0.27 | 0.905 |

Urolithin A recovery was assessed by adding the compound at a concentration of 10  $\mu$ M to the HG and NG medium, followed by inoculation of podocytes. Urolithin A was extracted from the cell culture medium immediately after inoculation as described in Preparation of samples for analysis paragraph. Three samples were examined for each type medium. The determined recovery of the Urolithin A was 72.2% for the NG cell culture medium and 77.1 % for the HG cell culture medium.

The intra- and inter-day repeatability of the developed method was evaluated by analyzing continuous injections of the same sample six times a day and for three consecutive days, and was expressed as relative standard deviation

(RSD). The intra-day precision of Urolithin A determination was range from 4.65% and the inter-day precision was 5.97%.

Supplementary Table S3. Primary antibodies.

| Primary Antibody                    | Application and Dilution | Catalog number | Source                                     |
|-------------------------------------|--------------------------|----------------|--------------------------------------------|
| Nephrin (G-8)                       | FC 1:200, IF 1:50        | sc-376522      | Santa Cruz Biotechnology, U.S.             |
| Nephrin                             | FC 1:100, WB 1:500       | ab216341       | Abcam, Cambridge, UK                       |
| EEA-1                               | IF 1:100                 | MA5-14794      | Invitrogen, Thermo Fisher Scientific, U.S. |
| Beta Actin                          | WB 1:5000                | ab8227         | Abcam, Cambridge, UK                       |
| SQSTM1 / p62                        | WB 1:10 000              | ab109012       | Abcam, Cambridge, UK                       |
| APG5L/ATG5                          | WB 1: 1000               | ab228668       | Abcam, Cambridge, UK                       |
| LC3B                                | WB 1:2 500               | ab51520        | Abcam, Cambridge, UK                       |
| Bcl-2                               | WB 1:1000                | ab196495       | Abcam, Cambridge, UK                       |
| HRP Alpha 1 Sodium Potassium ATPase | WB 1:5000                | ab196696       | Abcam, Cambridge, UK                       |
| Rabbit IgG Isotype Control          | IF 1:100, FC 1:100       | 10500C         | Invitrogen, Thermo Fisher Scientific, U.S. |

**WB:** Western blot, **FC:** Flow Cytometry, **IF:** Immunofluorescence, **EEA-1:** Early Endosome Antigen 1, **SQSTM1 /p62:** Sequestosome 1/ubiquitin-binding protein p62, **APG5L/ATG5:** Autophagy related 5 protein, **LC3B:** microtubule-associated protein 1A/1B light chain 3B, **Bcl-2:** B-cell lymphoma 2 protein, **HRP:** Horseradish peroxidase

Supplementary Table S4. Secondary antibodies.

| Secondary Antibody               | Application and Dilution | Catalog number | Source                                     |
|----------------------------------|--------------------------|----------------|--------------------------------------------|
| Goat anti-rabbit/Alexa Fluor 488 | FC 1:200 IF 1:100        | A32731         | Invitrogen, Thermo Fisher Scientific, U.S. |
| Goat anti-rabbit/Alexa Fluor 555 | IF 1:100                 | A-21429        | Invitrogen, Thermo Fisher Scientific, U.S. |
| Goat anti-rabbit/Alexa Fluor 647 | IF 1:100                 | ab150079       | Abcam, Cambridge, UK                       |
| MFP™-DY-490-Phalloidin           | IF 1:100                 | MFP-D490-33    | MoBiTec Molecular Biotechnology, Germany   |
| Anti-rabbit IgG, HRP-linked      | WB 1: 2000               | 7074S          | Cell Signaling Technology, U.S.            |

**WB:** Western blot, **FC:** Flow Cytometry, **IF:** Immunofluorescence, **HRP-linked:** Horseradish peroxidase-linked
